# Supplementary material for: Electrode dependence in halide perovskite memories: resistive switching behaviours
Source: Royal Society of Chemistry journal article supplement (doi:10.1039/d2qm00614f), 2022-01-01
Supplement: d2qm00614f1.pdf [file d2qm00614f1.pdf]

## Electronic Supplementary Information

### Electrode dependence in halide perovskite memories: Resistive switching behaviours

Gregory Soon How Thien<sup>a</sup>, Mohd Arif Mohd Sarjidan<sup>b</sup>, Noor Azrina Talik<sup>b</sup>, Boon Tong Goh<sup>b</sup>, Boon Kar Yap<sup>c,d,e</sup>, He Zhicai<sup>f</sup>, and Kah-Yoong Chan<sup>\*a</sup>.

<sup>a</sup>Centre for Advanced Devices and Systems, Faculty of Engineering, Multimedia University, 63100 Cyberjaya, Selangor, Malaysia. E-mail: kychan@mmu.edu.my

<sup>b</sup>Low Dimensional Materials Research Centre, Department of Physics, Faculty of Science, Universiti Malaya, 50603 Kuala Lumpur, Malaysia.

<sup>c</sup>Electronic and Communications Department, College of Engineering, Universiti Tenaga Nasional, 43000 Kajang, Selangor, Malaysia.

<sup>d</sup>Institute of Sustainable Energy, Universiti Tenaga Nasional, 43000 Kajang, Selangor, Malaysia.

<sup>e</sup>International School of Advanced Materials, South China University of Technology, 381 Wushan Road, Tianhe District, Guangzhou, Guangdong, P.R China

<sup>f</sup>Institute of Polymer Optoelectronic Materials and Devices, School of Materials Science & Engineering, South China University of Technology, 381 Wushan Rd, Tianhe District, Guangzhou, Guangdong Province, China.

**Table S1.** Comparison table of resistive switching memories employing halide perovskites with various top electrodes.

| Device Structure                                                                              | Type of Resistive Switching | ON/OFF ratio        | Endurance (cycle) | Retention (s)    | Top Electrode | Ref |
|-----------------------------------------------------------------------------------------------|-----------------------------|---------------------|-------------------|------------------|---------------|-----|
| Au/MAPbI <sub>3</sub> /Au/SiO <sub>2</sub> /Si                                                | Unipolar                    | 10 <sup>8</sup>     | 1000              | >10 <sup>4</sup> | Au            | 1   |
| Au/MAPbI <sub>3</sub> /Au/Ti/SiO <sub>2</sub> /Si                                             | Unipolar                    | 3 x 10 <sup>7</sup> | 100               | >10 <sup>3</sup> | Au            | 2   |
| Ag/Bphen/MAPbBr <sub>3</sub> /PEDOT:PSS/ITO                                                   | Unipolar                    | 80                  | 40                | 600              | Ag            | 3   |
| Au/CH <sub>3</sub> NH <sub>3</sub> PbI <sub>3</sub> /Pt/Ti/SiO <sub>2</sub> /Si               | Bipolar                     | >10 <sup>3</sup>    | 500               | >10 <sup>5</sup> | Au            | 4   |
| Au/A <sub>3</sub> Bi <sub>2</sub> I <sub>9</sub> /Pt/Ti/SiO <sub>2</sub> /Si                  | Bipolar                     | >10 <sup>7</sup>    | 400               | 10 <sup>3</sup>  | Au            | 5   |
| Au/CH <sub>3</sub> NH <sub>3</sub> PbI <sub>3</sub> /TiO <sub>2</sub> /FTO                    | Bipolar                     | 10 <sup>3</sup>     | 350               | >10 <sup>4</sup> | Au            | 6   |
| Au/Cs <sub>3</sub> Sb <sub>2</sub> I <sub>9</sub> /ITO                                        | Bipolar                     | -                   | 500               | 5000             | Au            | 7   |
| Au/CH <sub>3</sub> NH <sub>3</sub> PbI <sub>3-x</sub> Br <sub>x</sub> /ITO                    | Bipolar                     | >10 <sup>2</sup>    | -                 | >10 <sup>4</sup> | Au            | 8   |
| Ti/TiO <sub>2</sub> /CH <sub>3</sub> NH <sub>3</sub> PbCl <sub>1-x</sub> I <sub>3-x</sub> /Au | Bipolar                     | 20                  | -                 | >10 <sup>4</sup> | Au            | 9   |
| Au/CH <sub>3</sub> NH <sub>3</sub> PbI <sub>3</sub> /ITO/PET                                  | Bipolar                     | 10 <sup>4</sup>     | 400               | >10 <sup>4</sup> | Au            | 10  |
| Au/CsPb <sub>2</sub> Br <sub>5</sub> /ITO                                                     | Bipolar                     | ~10 <sup>2</sup>    | 500               | 10 <sup>4</sup>  | Au            | 11  |
| Au/(ZnO)/MAPbI <sub>3</sub> /ITO                                                              | Bipolar                     | -                   | 300               | >10 <sup>4</sup> | Au            | 12  |
| Au/Cs <sub>4</sub> PbBr <sub>6</sub> /PEDOT:PSS/ITO                                           | Bipolar                     | -                   | 100               | 10 <sup>4</sup>  | Au            | 13  |

|                                                                                                                         |         |                      |                     |                                  |              |    |
|-------------------------------------------------------------------------------------------------------------------------|---------|----------------------|---------------------|----------------------------------|--------------|----|
| Au/Cs <sub>0.06</sub> FA <sub>0.78</sub> MA <sub>0.16</sub> Pb(I <sub>0.92</sub> Br <sub>0.08</sub> ) <sub>3</sub> /ITO | Bipolar | >10 <sup>2</sup>     | 10 <sup>3</sup>     | 10 <sup>5</sup>                  | Au           | 14 |
| Au/Cs <sub>3</sub> Sb <sub>2</sub> Br <sub>9</sub> /Au                                                                  | Bipolar | >10 <sup>3</sup>     | 200                 | 2 x 10 <sup>4</sup>              | Au           | 15 |
| Au/Cs <sub>2</sub> BiAgBr <sub>6</sub> /ITO                                                                             | Bipolar | 10 <sup>4</sup>      | 100                 | 10 <sup>3</sup>                  | Au           | 16 |
| Ag/CH <sub>3</sub> NH <sub>3</sub> PbI <sub>3-x</sub> Cl <sub>x</sub> /FTO                                              | Bipolar | -                    | 10 <sup>3</sup>     | 4 x 10 <sup>4</sup>              | Ag           | 17 |
| Ag/AZO/(C <sub>4</sub> H <sub>9</sub> NH <sub>3</sub> ) <sub>2</sub> PbBr <sub>4</sub> /Pt                              | Bipolar | 10 <sup>6</sup>      | 3 x 10 <sup>4</sup> | 5 x 10 <sup>4</sup>              | Ag           | 18 |
| ITO/PMMA/CH <sub>3</sub> NH <sub>3</sub> PbBr <sub>3</sub> :PMMA/PMMA/Ag                                                | Bipolar | >10 <sup>3</sup>     | -                   | 4000                             | Ag           | 19 |
| Ag/CH <sub>3</sub> NH <sub>3</sub> PbI <sub>3</sub> /Pt                                                                 | Bipolar | 10 <sup>6</sup>      | 10 <sup>3</sup>     | 29800                            | Ag           | 20 |
| Ag/CsPbBr <sub>3</sub> /Ag                                                                                              | Bipolar | ~10 <sup>3</sup>     | 10 <sup>3</sup>     | >400                             | Ag           | 21 |
| FTO/CH <sub>3</sub> NH <sub>3</sub> PbI <sub>3-x</sub> Cl <sub>x</sub> /Ag Probe                                        | Bipolar | 10 <sup>6</sup>      | 10 <sup>4</sup>     | 2 x 10 <sup>3</sup>              | Ag           | 22 |
| Ag/(PEA) <sub>2</sub> Cs <sub>3</sub> Pb <sub>4</sub> I <sub>3</sub> /Pt/Ti/SiO <sub>2</sub> /Si                        | Bipolar | 10 <sup>9</sup>      | 200                 | 2000                             | Ag           | 23 |
| Ag/PMMA/PEA <sub>2</sub> PbI <sub>4</sub> /MAPbI <sub>3</sub> /Pt/Ti/SiO <sub>2</sub> /Si                               | Bipolar | >10 <sup>6</sup>     | 2700                | >10 <sup>3</sup>                 | Ag           | 24 |
| Ag/CsPbBr <sub>3</sub> /MoO <sub>3</sub> /Ag                                                                            | Bipolar | >100                 | 50                  | -                                | Ag           | 25 |
| Ag/BA <sub>2</sub> PbI <sub>4</sub> /Pt                                                                                 | Bipolar | -                    | 250                 | 10 <sup>3</sup>                  | Ag           | 26 |
| Ag/CsSnBr <sub>3</sub> /Pt                                                                                              | Bipolar | >10 <sup>2</sup>     | -                   | -                                | Ag           | 27 |
| Ag/BA <sub>2</sub> CsAgBiBr <sub>7</sub> /Pt                                                                            | Bipolar | 10 <sup>7</sup>      | ~1000               | 2 x 10 <sup>4</sup>              | Ag           | 28 |
| Ag/CsSnCl <sub>3</sub> /ITO                                                                                             | Bipolar | 10 <sup>2</sup>      | 10 <sup>5</sup>     | >10 <sup>4</sup>                 | Ag           | 29 |
| Ag/PMMA/CsSnI <sub>3</sub> /Pt/Ti/SiO <sub>2</sub> /Si                                                                  | Bipolar | >10 <sup>3</sup>     | 600                 | 7 x 10 <sup>3</sup>              | Ag           | 30 |
| Au/PMMA/CsSnI <sub>3</sub> /Pt/Ti/SiO <sub>2</sub> /Si                                                                  |         | >5 x 10 <sup>2</sup> | 120                 | -                                |              |    |
| Al/CsPbBr <sub>3</sub> /PEDOT:PSS/ITO/PET                                                                               | Bipolar | ~10 <sup>2</sup>     | 50                  | -                                | Al           | 31 |
| Al/PMMA/CsPbCl <sub>3</sub> /PMMA/ITO                                                                                   | Bipolar | 2 x 10 <sup>4</sup>  | 95                  | 1 x 10 <sup>4</sup>              | Al           | 32 |
| Al/Cs <sub>3</sub> Cu <sub>2</sub> I <sub>5</sub> /ITO                                                                  | Bipolar | ~65                  | 200                 | 10 <sup>4</sup>                  | Al           | 33 |
| ITO/MAPbI <sub>3-x</sub> Cl <sub>x</sub> /2D perovskite/Al                                                              | Bipolar | >10 <sup>3</sup>     | 10 <sup>4</sup>     | 3 x 10 <sup>2</sup>              | Al           | 34 |
| Al@MAPbI <sub>3</sub> /Al                                                                                               | Bipolar | ~10 <sup>6</sup>     | 500                 | >10 <sup>4</sup>                 | Al           | 35 |
| ITO/FA-MA-Cs tri-cation perovskite/PMMA/Al                                                                              | Bipolar | >10 <sup>3</sup>     | 130                 | 10 <sup>4</sup>                  | Al           | 36 |
| ITO/MAPbI <sub>3</sub> -TiO <sub>2</sub> /PMMA/Al                                                                       | Bipolar | -                    | 50                  | 10 <sup>3</sup> ~10 <sup>4</sup> | Al           | 37 |
| Al/CsBi <sub>3</sub> I <sub>10</sub> /ITO                                                                               | Bipolar | 10 <sup>3</sup>      | 150                 | 10 <sup>4</sup>                  | Al           | 38 |
| Al/PCBM/Cs <sub>3</sub> Sb <sub>2</sub> I <sub>9</sub> /PEDOT:PSS:ITO                                                   | Bipolar | ~10 <sup>4</sup>     | 100                 | >10 <sup>4</sup>                 | Al           | 39 |
| ITO/PEI/CH <sub>3</sub> NH <sub>3</sub> PbI <sub>3</sub> /PEI/metal                                                     | Bipolar | 20                   | 4000                | -                                | InGA, Al, Au | 40 |
| Pt/CsPbBr <sub>3</sub> /Cu <sub>2</sub> O/FTO                                                                           | Bipolar | 10 <sup>3</sup>      | 1000                | -                                | Pt           | 41 |

|                                                                                                                                       |            |                  |                       |                       |    |    |
|---------------------------------------------------------------------------------------------------------------------------------------|------------|------------------|-----------------------|-----------------------|----|----|
| FTO/ZnO/CH <sub>3</sub> NH <sub>3</sub> PbI <sub>1-x</sub> Bi <sub>x</sub> Br <sub>3</sub> /Pt                                        | Bipolar    | 10 <sup>5</sup>  | 100                   | -                     | Pt | 42 |
| Pt/Cs <sub>2</sub> AgBiBr <sub>6</sub> /ITO /                                                                                         | Bipolar    | ~100             | >500                  | >2400                 | Pt | 43 |
| Pt/CsSnBr <sub>3</sub> /Pt                                                                                                            | Bipolar    | >10 <sup>5</sup> | 50                    | 10 <sup>4</sup>       | Pt | 44 |
| Ni/ZnO/CsPbBr <sub>3</sub> /FTO                                                                                                       | Bipolar    | >10 <sup>5</sup> | 100                   | >10 <sup>4</sup>      | Ni | 45 |
| FTO/CH <sub>3</sub> NH <sub>3</sub> PbI <sub>3</sub> /W                                                                               | Bipolar    | >10 <sup>2</sup> | 100                   | -                     | W  | 46 |
| Cu/MA <sub>3</sub> Bi <sub>2</sub> I <sub>9</sub> /ITO                                                                                | Bipolar    | 10 <sup>4</sup>  | 1730                  | 3 x 10 <sup>5</sup>   | Cu | 47 |
| Ag/PMMA/4wt%-RbPbI <sub>2.4</sub> Cl <sub>0.6</sub> @PMMA/ITO                                                                         | Bipolar    | >10 <sup>3</sup> | 1000                  | 10 <sup>4</sup>       | Ag | 48 |
| Ag/PMMA/6wt%-RbPbI <sub>2.4</sub> Cl <sub>0.6</sub> @PMMA/ITO                                                                         | Worm       | -                | -                     | -                     | -  | -  |
| ITO/CH <sub>3</sub> NH <sub>3</sub> PbI <sub>3</sub> /Al                                                                              | Bipolar    | -                | -                     | -                     | Al | -  |
| ITO/CH <sub>3</sub> NH <sub>3</sub> PbI <sub>3</sub> /Ag                                                                              | WORM       | -                | -                     | -                     | Ag | 49 |
| ITO/CH <sub>3</sub> NH <sub>3</sub> PbI <sub>3</sub> /Au                                                                              | WORM       | -                | -                     | -                     | Au | -  |
| Au/FAMAPbI <sub>3</sub> /ITO                                                                                                          | WORM       | 40               | -                     | 10 <sup>2</sup>       | Au | 50 |
| Au/(RNH <sub>3</sub> ) <sub>2</sub> (FA) <sub>1</sub> Pb <sub>2</sub> Br <sub>7</sub> /ITO                                            | WORM       | 10 <sup>2</sup>  | -                     | 10 <sup>4</sup>       | Au | 51 |
| Au/MAPbBr <sub>3</sub> /ITO                                                                                                           | WORM       | 10 <sup>6</sup>  | -                     | 10 <sup>4</sup>       | Au | 52 |
| Au/CsPbBr <sub>3</sub> /ITO                                                                                                           | WORM       | 10 <sup>4</sup>  | -                     | >10 <sup>3</sup>      | Au | 53 |
| ITO/CH <sub>3</sub> NH <sub>3</sub> PbI <sub>3</sub> :PVK/Al                                                                          | WORM       | >10 <sup>3</sup> | -                     | -                     | Al | 54 |
| Al/MAPbBr <sub>3</sub> :PEO/Al                                                                                                        | WORM       | 10 <sup>4</sup>  | -                     | 10 <sup>4</sup>       | Al | 55 |
| Al/(CH <sub>3</sub> NH <sub>3</sub> ) <sub>2</sub> PbI <sub>2</sub> (SCN) <sub>2</sub> /ITO                                           | WORM       | 10 <sup>3</sup>  | -                     | 10 <sup>4</sup>       | Al | 56 |
| Au/PMMA/AgBiI <sub>7-3</sub> Cs <sub>3</sub> Bi <sub>2</sub> I <sub>9</sub> /Pt                                                       | Multilevel | >10 <sup>7</sup> | 10 <sup>3</sup>       | >5 x 10 <sup>4</sup>  | Au | 57 |
| Au/MA <sub>3</sub> Bi <sub>2</sub> I <sub>9</sub> /ITO                                                                                | Multilevel | 100              | 300                   | ~10 <sup>4</sup>      | Au | 58 |
| Au/CsPbBr <sub>3</sub> /ITO                                                                                                           | Multilevel | 10 <sup>7</sup>  | -                     | >10 <sup>3</sup>      | Au | 59 |
| Au/CsPbBr <sub>3</sub> /FTO                                                                                                           | Multilevel | ~10 <sup>5</sup> | 1000                  | >10 <sup>4</sup>      | Au | 60 |
| Au/KCl-CH <sub>3</sub> NH <sub>3</sub> PbI <sub>3-x</sub> Cl <sub>x</sub> /ITO                                                        | Multilevel | -                | 140                   | >10 <sup>3</sup>      | Au | 61 |
| (ITO)/CsSnBr <sub>3</sub> /Au                                                                                                         | Multilevel | ~10 <sup>5</sup> | 400                   | ~10 <sup>3</sup>      | Au | 62 |
| Ag/CsPb <sub>1-x</sub> Bi <sub>x</sub> I <sub>3</sub> /ITO                                                                            | Multilevel | -                | 250                   | ~10 <sup>4</sup>      | Ag | 63 |
| Ag/PMMA/[C <sub>6</sub> H <sub>5</sub> (CH <sub>2</sub> ) <sub>n</sub> NH <sub>3</sub> ]CuBr <sub>4</sub> /Pt/Ti/SiO <sub>2</sub> /Si | Multilevel | ~10 <sup>8</sup> | 2000                  | >10 <sup>2</sup>      | Ag | 64 |
| Pt/oxide-passivated MAPbI <sub>3</sub> /PMMA/Ag                                                                                       | Multilevel | 10 <sup>6</sup>  | 5.7 x 10 <sup>4</sup> | 7.8 x 10 <sup>4</sup> | Ag | 65 |
| Ag/CsPbBr <sub>3</sub> /Pt                                                                                                            | Multilevel | ~10 <sup>4</sup> | -                     | >5 x 10 <sup>4</sup>  | Ag | 66 |
| Ag/FAPbI <sub>3</sub> /Pt                                                                                                             | Multilevel | >10 <sup>5</sup> | 1200                  | 3000                  | Ag | 67 |

|                                                                                              |            |                  |                 |                  |     |    |
|----------------------------------------------------------------------------------------------|------------|------------------|-----------------|------------------|-----|----|
| Ag(AgO <sub>x</sub> )/Cs <sub>3</sub> Bi <sub>2</sub> I <sub>10</sub> /FTO                   | Multilevel | ~10 <sup>6</sup> | 250             | >10 <sup>3</sup> | Ag  | 68 |
| Ag(AgO <sub>x</sub> )/Cs <sub>3</sub> Bi <sub>2</sub> I <sub>9</sub> /FTO                    |            |                  |                 | <10 <sup>3</sup> |     |    |
| Ag/PMMA/CsPbI <sub>3</sub> /Pt/Ti/SiO <sub>2</sub> /Si                                       | Multilevel | >10 <sup>6</sup> | 300             | 1000             | Ag  | 69 |
| Al/CsPbCl <sub>x</sub> Br <sub>3-x</sub> , (x = 3, 1.5, 0)/ITO/PET                           | Multilevel | ~10 <sup>3</sup> | 10 <sup>3</sup> | >10 <sup>3</sup> | Al  | 70 |
| Al/RbPbBr <sub>3</sub> /ITO/PET                                                              | Multilevel | 10 <sup>3</sup>  | 1000            | ~10 <sup>4</sup> | Al  | 71 |
| NiO/(C <sub>4</sub> H <sub>9</sub> NH <sub>3</sub> ) <sub>2</sub> PbBr <sub>4</sub> /ZnO/FTO | Multilevel | -                | -               | -                | NiO | 72 |
| Pt/Cs <sub>2</sub> AgBiBr <sub>6</sub> /ITO                                                  | Multilevel | 500              | -               | 1200             | Pt  | 73 |

\*MA = CH<sub>3</sub>NH<sub>3</sub>, FA = HC(NH<sub>2</sub>)<sub>2</sub>

## References

- 1 K. Kang, H. Ahn, Y. Song, W. Lee, J. Kim, Y. Kim, D. Yoo and T. Lee, High-performance solution-processed organo-metal halide perovskite unipolar resistive memory devices in a cross-bar array structure, *Adv. Mater.*, 2019, **31**, 1804841.
- 2 H. Ahn, K. Kang, Y. Song, W. Lee, J. Kim, J. Kim, J. Lee, K. Baek, J. Shin, H. Lim, Y. Kim, J. S. Lee and T. Lee, Resistive switching by percolative conducting filaments in organometal perovskite unipolar memory devices analyzed using current noise spectra, *Adv. Funct. Mater.*, 2022, **32**, 2107727.
- 3 X. Yu, T. Shen, C. Zhu, Q. Zeng, A. Yu, S. Liu, R. Yi, Z. Weng, Y. Zhan, X. Hou and J. Qin, Memory devices via unipolar resistive switching in symmetric organic-inorganic perovskite nanoscale heterolayers, *ACS Appl. Nano Mater.*, 2020, **3**, 11889–11896.
- 4 B. Hwang and J.-S. Lee, A strategy to design high-density nanoscale devices utilizing vapor deposition of metal halide perovskite materials, *Adv. Mater.*, 2017, **29**, 1701048.
- 5 C. Cuhadar, S. G. Kim, J. M. Yang, J. Y. Seo, D. Lee and N. G. Park, All-inorganic bismuth halide perovskite-like materials A<sub>3</sub>Bi<sub>2</sub>I<sub>9</sub> and A<sub>3</sub>Bi<sub>1.8</sub>Na<sub>0.2</sub>I<sub>8.6</sub> (A = Rb and Cs) for low-voltage switching resistive memory, *ACS Appl. Mater. Interfaces*, 2018, **10**, 29741–29749.
- 6 S. Lee, S. Wolfe, J. Torres, M. Yun and J.-K. Lee, Asymmetric bipolar resistive switching of halide perovskite film in contact with TiO<sub>2</sub> Layer, *ACS Appl. Mater. Interfaces*, 2021, **13**, 27209–27216.
- 7 Y. Park, S. H. Kim, D. Lee and J.-S. Lee, Designing zero-dimensional dimer-type all-inorganic perovskites for ultra-fast switching memory, *Nat. Commun.*, 2021, **12**, 3527.
- 8 B. Hwang, C. Gu, D. Lee and J.-S. Lee, Effect of halide-mixing on the switching behaviors of organic-inorganic hybrid perovskite memory, *Sci. Rep.*, 2017, **7**, 43794.
- 9 K. Yan, B. Chen, H. Hu, S. Chen, B. Dong, X. Gao, X. Xiao, J. Zhou and D. Zou, First fiber-shaped non-volatile memory device based on hybrid organic-inorganic perovskite, *Adv. Electron. Mater.*, 2016, **2**, 1600160.

- 10 C. Gu and J.-S. Lee, Flexible hybrid organic–inorganic perovskite memory, *ACS Nano*, 2016, **10**, 5413–5418.
- 11 J. H. Jung, S. H. Kim, Y. Park, D. Lee and J. S. Lee, Metal-halide perovskite design for next-generation memories: first-principles screening and experimental verification, *Adv. Sci.*, 2020, **7**, 1–8.
- 12 E. Yoo, S. V. N. Pammi, K. Y. Kim, T.-V. Dang, J.-H. Eom, Y. J. Choi and S.-G. Yoon, Strategic extended air stability of organolead halide perovskite nonvolatile memory devices, *J. Alloys Compd.*, 2019, **811**, 151999.
- 13 R. Chen, J. Xu, M. Lao, Z. Liang, Y. Chen, C. Zhong, L. Huang, A. Hao and M. Ismail, Transient resistive switching for nonvolatile memory based on water-soluble Cs<sub>4</sub>PbBr<sub>6</sub> perovskite films, *Phys. Status Solidi - Rapid Res. Lett.*, 2019, **13**, 1–7.
- 14 Y. Huang, L. Tang, C. Wang, H. Fan, Z. Zhao, H. Wu, M. Xu, R. Shen, Y. Yang and J. Bian, Triple-cation perovskite resistive switching memory with enhanced endurance and retention, *ACS Appl. Electron. Mater.*, 2020, **2**, 3695–3703.
- 15 J.-Y. Mao, Z. Zheng, Z.-Y. Xiong, P. Huang, G.-L. Ding, R. Wang, Z.-P. Wang, J.-Q. Yang, Y. Zhou, T. Zhai and S.-T. Han, Lead-free monocrystalline perovskite resistive switching device for temporal information processing, *Nano Energy*, 2020, **71**, 104616.
- 16 X. Wang, N. Ali, G. Bi and H. Wu, Investigation of resistive switching in lead-free bismuth–silver halide double perovskite, *Semicond. Sci. Technol.*, 2022, **37**, 065011.
- 17 E. Yoo, M. Lyu, J.-H. Yun, C. Kang, Y. Choi and L. Wang, Bifunctional resistive switching behavior in an organolead halide perovskite based Ag/CH<sub>3</sub>NH<sub>3</sub>PbI<sub>3-x</sub>Cl<sub>x</sub>/FTO structure, *J. Mater. Chem. C*, 2016, **4**, 7824–7830.
- 18 Y. Park and J. S. Lee, Bifunctional silver-doped ZnO for reliable and stable organic-inorganic hybrid perovskite memory, *ACS Appl. Mater. Interfaces*, 2021, **13**, 1021–1026.
- 19 K. Yang, F. Li, C. P. Veeramalai and T. Guo, A facile synthesis of CH<sub>3</sub>NH<sub>3</sub>PbBr<sub>3</sub> perovskite quantum dots and their application in flexible nonvolatile memory, *Appl. Phys. Lett.*, , DOI:10.1063/1.4976709.
- 20 J. Choi, Q. Van Le, K. Hong, C. W. Moon, J. S. Han, K. C. Kwon, P. R. Cha, Y. Kwon, S. Y. Kim and H. W. Jang, Enhanced endurance organolead halide perovskite resistive switching memories operable under an extremely low bending radius, *ACS Appl. Mater. Interfaces*, 2017, **9**, 30764–30771.
- 21 J. Liu, J. Jin, Z. Yang, J. Cai, J. Yue, J. Impundu, H. Liu, H. Wei, Z. Peng, Y. J. Li and L. Sun, Extremely low program current memory based on self-assembled all-inorganic perovskite single crystals, *ACS Appl. Mater. Interfaces*, 2020, **12**, 31776–31782.
- 22 A. Shaban, M. Joodaki, S. Mehregan and I. W. Rangelow, Probe-induced resistive switching memory based on organic-inorganic lead halide perovskite materials, *Org. Electron.*, 2019, **69**, 106–113.
- 23 H. Kim, M. J. Choi, J. M. Suh, J. S. Han, S. G. Kim, Q. Van Le, S. Y. Kim and H. W. Jang, Quasi-2D halide perovskites for resistive switching devices with ON/OFF ratios above 10<sup>9</sup>, *NPG Asia Mater.*, 2020, **12**, 0–10.
- 24 S. Lee, H. Kim, D. H. Kim, W. Bin Kim, J. M. Lee, J. Choi, H. Shin, G. S. Han, H. W. Jang and H. S. Jung, Tailored 2D/3D halide perovskite heterointerface for substantially enhanced endurance in conducting bridge resistive switching memory, *ACS Appl. Mater. Interfaces*, 2020, **12**, 17039–17045.
- 25 C. Zou, L. He and L. Y. Lin, Vacuum-Deposited inorganic perovskite memory arrays with long-term ambient stability, *Phys. Status Solidi - Rapid Res. Lett.*, 2019, **13**, 1–6.
- 26 J.-Y. Seo, J. Choi, H.-S. Kim, J. Kim, J.-M. Yang, C. Cuhadar, J. S. Han, S.-J. Kim, D. Lee, H. W. Jang and N.-G. Park, Wafer-scale reliable switching memory based on 2-dimensional layered organic–inorganic halide perovskite, *Nanoscale*, 2017, **9**, 15278–15285.

- 27 H. Wang, H. Wei, X. Zeng, J. Zhou and Y. Zhu, Conductive Path mechanism for bipolar resistive switching characteristics in lead-free perovskite CsSnBr<sub>3</sub>-based nonvolatile memories, *Phys. status solidi*, 2021, **218**, 2100501.
- 28 S. Y. Kim, J. M. Yang, S. H. Lee and N. G. Park, A layered (n-C<sub>4</sub>H<sub>9</sub>NH<sub>3</sub>)<sub>2</sub>CsAgBiBr<sub>7</sub> perovskite for bipolar resistive switching memory with a high ON/OFF ratio, *Nanoscale*, 2021, **13**, 12475–12483.
- 29 A. Siddik, P. K. Haldar, T. Paul, U. Das, A. Barman, A. Roy and P. K. Sarkar, Nonvolatile resistive switching and synaptic characteristics of lead-free all-inorganic perovskite-based flexible memristive devices for neuromorphic systems, *Nanoscale*, 2021, **13**, 8864–8874.
- 30 J. S. Han, Q. Van Le, J. Choi, H. Kim, S. G. Kim, K. Hong, C. W. Moon, T. L. Kim, S. Y. Kim and H. W. Jang, Lead-free all-inorganic cesium tin iodide perovskite for filamentary and interface-type resistive switching toward environment-friendly and temperature-tolerant nonvolatile memories, *ACS Appl. Mater. Interfaces*, 2019, **11**, 8155–8163.
- 31 D. Liu, Q. Lin, Z. Zang, M. Wang, P. Wangyang, X. Tang, M. Zhou and W. Hu, Flexible all-inorganic perovskite CsPbBr<sub>3</sub> nonvolatile memory device, *ACS Appl. Mater. Interfaces*, 2017, **9**, 6171–6176.
- 32 H. An, W. K. Kim, C. Wu and T. W. Kim, Highly-stable memristive devices based on poly(methylmethacrylate): CsPbCl<sub>3</sub> perovskite quantum dot hybrid nanocomposites, *Org. Electron.*, 2018, **56**, 41–45.
- 33 F. Zeng, Y. Tan, W. Hu, X. Tang, Z. Luo, Q. Huang, Y. Guo, X. Zhang, H. Yin, J. Feng, X. Zhao and B. Yang, Impact of hydroiodic acid on resistive switching performance of lead-free Cs<sub>3</sub>Cu<sub>2</sub>I<sub>5</sub> perovskite memory, *J. Phys. Chem. Lett.*, 2021, **12**, 1973–1978.
- 34 F. Xia, Y. Xu, B. Li, W. Hui, S. Zhang, L. Zhu, Y. Xia, Y. Chen and W. Huang, Improved performance of CH<sub>3</sub>NH<sub>3</sub>PbI<sub>3-x</sub>Cl<sub>x</sub> resistive switching memory by assembling 2D/3D perovskite heterostructures, *ACS Appl. Mater. Interfaces*, 2020, **12**, 15439–15445.
- 35 P. Shu, X. Cao, Y. Du, J. Zhou, J. Zhou, S. Xu, Y. Liu and S. Cao, Resistive switching performance of fibrous crosspoint memories based on an organic–inorganic halide perovskite, *J. Mater. Chem. C*, 2020, **8**, 12865–12875.
- 36 Y.-W. Hsiao, S.-Y. Wang, C.-L. Huang, C.-C. Leu and C.-F. Shih, Resistive switching property of organic–inorganic tri-cation lead iodide perovskite memory device, *Nanomaterials*, 2020, **10**, 1155.
- 37 G. S. H. Thien, N. A. Talik, B. K. Yap, H. Nakajima, S. Tunmee, N. Chanlek and B. T. Goh, Improvement of MAPbI<sub>3</sub> perovskite blend with TiO<sub>2</sub> nanoparticles as ReRAM device, *Ceram. Int.*, 2020, **46**, 29041–29051.
- 38 Z. Xiong, W. Hu, Y. She, Q. Lin, L. Hu, X. Tang and K. Sun, Air-Stable lead-free perovskite thin film based on CsBi<sub>3</sub>I<sub>10</sub> and its application in resistive switching devices, *ACS Appl. Mater. Interfaces*, 2019, **11**, 30037–30044.
- 39 S. Paramanik, A. Maiti, S. Chatterjee and A. J. Pal, Large resistive switching and artificial synaptic behaviors in layered Cs<sub>3</sub>Sb<sub>2</sub>I<sub>9</sub> lead-free perovskite memory devices, *Adv. Electron. Mater.*, 2022, **8**, 2100237.
- 40 X. Wu, H. Yu and J. Cao, Unraveling the origin of resistive switching behavior in organolead halide perovskite based memory devices, *AIP Adv.*, 2020, **10**, 085202.
- 41 H. Liu, Y. Wu and Y. Hu, Reproducible switching effect of an all-inorganic halide perovskite CsPbBr<sub>3</sub> for memory applications, *Ceram. Int.*, 2017, **43**, 7020–7025.
- 42 W. Ruan, Y. Hu, F. Xu and S. Zhang, Resistive switching behavior of organic-metallic halide perovskites CH<sub>3</sub>NH<sub>3</sub>Pb<sub>1-x</sub>BiBr<sub>3</sub>, *Org. Electron.*, 2019, **70**, 252–257.
- 43 F. Lv, T. Zhong, Y. Qin, H. Qin, W. Wang, F. Liu and W. Kong, Resistive switching characteristics improved by visible-light irradiation in a Cs<sub>2</sub>AgBiBr<sub>6</sub>-Based Memory Device, *Nanomaterials*, 2021, **11**, 1361.

- 44 H. Wang, J. Lin, Y. Zhu, X. Zeng, H. Wei, P. Cheng, H. Lu, Y. Liu and R. Xiong, Fabrication of flexible resistive switching devices based on lead-free all-inorganic CsSnBr<sub>3</sub> perovskite using a one-step chemical vapor deposition method, *Adv. Electron. Mater.*, 2020, **6**, 1–7.
- 45 Y. Wu, Y. Wei, Y. Huang, F. Cao, D. Yu, X. Li and H. Zeng, Capping CsPbBr<sub>3</sub> with ZnO to improve performance and stability of perovskite memristors, *Nano Res.*, 2017, **10**, 1584–1594.
- 46 H. Cai, G. Ma, Y. He, C. Liu and H. Wang, A remarkable performance of CH<sub>3</sub>NH<sub>3</sub>PbI<sub>3</sub> perovskite memory based on passivated method, *Org. Electron.*, 2018, **58**, 301–305.
- 47 S. Poddar, Y. Zhang, Y. Zhu, Q. Zhang and Z. Fan, Optically tunable ultra-fast resistive switching in lead-free methyl-ammonium bismuth iodide perovskite films, *Nanoscale*, 2021, **13**, 6184–6191.
- 48 U. Das, A. Dehingia, B. Paul, P. K. Sarkar and A. Roy, Improvement of the resistive switching characteristics upon halide mixing in an all-inorganic RbPbI<sub>3</sub> perovskite polymer composite based flexible device, *J. Phys. Chem. C*, 2021, **125**, 13610–13618.
- 49 G. T. S. How, N. A. Talik, B. K. Yap, H. Nakajima, S. Tunmee and B. T. Goh, Multiple resistive switching behaviours of CH<sub>3</sub>NH<sub>3</sub>PbI<sub>3</sub> perovskite film with different metal electrodes, *Appl. Surf. Sci.*, 2019, **473**, 194–202.
- 50 H. M. Yu, C. Park, D. Y. Park, S. C. Lim, G. Namkoong and M. S. Jeong, Probing pathways of conductive filaments of FAMAPbI<sub>3</sub> with controlled FA composition using conductive atomic force microscopy, *J. Phys. Chem. C*, 2021, **125**, 25067–25074.
- 51 H. J. Jeong, C. Park, H. Jeon, K.-N. Lee, J. Lee, S. C. Lim, G. Namkoong and M. S. Jeong, Quasi-2D halide perovskite memory device formed by acid–base binary ligand solution composed of oleylamine and oleic acid, *ACS Appl. Mater. Interfaces*, 2021, **13**, 40891–40900.
- 52 B. Li, H. Yin, F. Xia, B. Sun, S. Zhang, Y. Xia, Y. Chen and W. Huang, Robust and Transient write-once-read-many-times memory device based on hybrid perovskite film with novel room temperature molten salt solvent, *Adv. Electron. Mater.*, 2020, **6**, 2000109.
- 53 Z. Chen, Y. Zhang, Y. Yu, Y. Che, L. Jin, Y. Li, Q. Li, T. Li, H. Dai and J. Yao, Write once read many times resistance switching memory based on all-inorganic perovskite CsPbBr<sub>3</sub> quantum dot, *Opt. Mater. (Amst.)*, 2019, **90**, 123–126.
- 54 C. Wang, Y. Chen, B. Zhang, S. Liu, Q. Chen, Y. Cao and S. Sun, High-efficiency bulk heterojunction memory devices fabricated using organometallic halide perovskite:poly(*N*-vinylcarbazole) blend active layers, *Dalt. Trans.*, 2016, **45**, 484–488.
- 55 E. Ercan, J.-Y. Chen, P.-C. Tsai, J.-Y. Lam, S. C.-W. Huang, C.-C. Chueh and W.-C. Chen, A Redox-based resistive switching memory device consisting of organic-inorganic hybrid perovskite/polymer composite thin film, *Adv. Electron. Mater.*, 2017, **3**, 1700344.
- 56 X.-F. Cheng, X. Hou, J. Zhou, B.-J. Gao, J.-H. He, H. Li, Q.-F. Xu, N.-J. Li, D.-Y. Chen and J.-M. Lu, Pseudohalide-induced 2D (CH<sub>3</sub>NH<sub>3</sub>)<sub>2</sub>PbI<sub>2</sub>(SCN)<sub>2</sub> perovskite for ternary resistive memory with high performance, *Small*, 2018, **14**, 1703667.
- 57 J. S. Han, Q. Van Le, H. Kim, Y. J. Lee, D. E. Lee, I. H. Im, M. K. Lee, S. J. Kim, J. Kim, K. J. Kwak, M. J. Choi, S. A. Lee, K. Hong, S. Y. Kim and H. W. Jang, Lead-free dual-phase halide perovskites for preconditioned conducting-bridge memory, *Small*, 2020, **16**, 1–9.
- 58 B. Hwang and J.-S. Lee, Lead-free, air-stable hybrid organic–inorganic perovskite resistive switching memory with ultrafast switching and multilevel data storage, *Nanoscale*, 2018, **10**, 8578–8584.
- 59 Z. Chen, Y. Zhang, Y. Yu, M. Cao, Y. Che, L. Jin, Y. Li, Q. Li, T. Li, H. Dai, J. Yang and J. Yao, Light assisted multilevel resistive switching memory devices based on all-inorganic perovskite quantum dots, *Appl. Phys. Lett.*, 2019, **114**, 181103.

- 60 W. Ruan, Y. Hu, T. Qiu, F. Bai, S. Zhang and F. Xu, Morphological regulation of all-inorganic perovskites for multilevel resistive switching, *J. Phys. Chem. Solids*, 2019, **127**, 258–264.
- 61 F. Lv, K. Ling, T. Zhong, F. Liu, X. Liang, C. Zhu, J. Liu and W. Kong, Multilevel resistive switching memory based on a  $\text{CH}_3\text{NH}_3\text{PbI}_{3-x}\text{Cl}_x$  film with potassium chloride additives, *Nanoscale Res. Lett.*, 2020, **15**, 126.
- 62 R. Ray and S. K. Pal, Solution-processed photoinduced multilevel resistive switching devices based on lead-free all-inorganic perovskite, *IEEE Electron Device Lett.*, 2021, **42**, 1284–1287.
- 63 S. Ge, Y. Wang, Z. Xiang and Y. Cui, Reset voltage-dependent multilevel resistive switching behavior in  $\text{CsPb}_{1-x}\text{Bi}_x\text{I}_3$  Perovskite-Based Memory Device, *ACS Appl. Mater. Interfaces*, 2018, **10**, 24620–24626.
- 64 S. Kim, J. Yang, E. Choi and N. Park, Layered  $(\text{C}_6\text{H}_5\text{CH}_2\text{NH}_3)_2\text{CuBr}_4$  perovskite for multilevel storage resistive switching memory, *Adv. Funct. Mater.*, 2020, **30**, 2002653.
- 65 S. Lee, W. Bin Kim, J. M. Lee, H. J. Kim, J. H. Choi and H. S. Jung, Oxide passivation of halide perovskite resistive memory device: a strategy for overcoming endurance problem, *ACS Appl. Mater. Interfaces*, 2021, **13**, 44577–44584.
- 66 Y. Zhu, P. Cheng, J. Shi, H. Wang, Y. Liu, R. Xiong, H. Ma and H. Ma, Bromine vacancy redistribution and metallic-ion-migration-induced air-stable resistive switching behavior in all-inorganic perovskite  $\text{CsPbBr}_3$  film-based memory device, *Adv. Electron. Mater.*, 2020, **6**, 1900754.
- 67 J.-M. Yang, S.-G. Kim, J.-Y. Seo, C. Cuhadar, D.-Y. Son, D. Lee and N.-G. Park, 1D hexagonal  $\text{HC}(\text{NH}_2)_2\text{PbI}_3$  for multilevel resistive switching nonvolatile memory, *Adv. Electron. Mater.*, 2018, **4**, 1800190.
- 68 S. Ge, X. Guan, Y. Wang, C. Lin, Y. Cui, Y. Huang, X. Zhang, R. Zhang, X. Yang and T. Wu, Low-dimensional lead-free inorganic perovskites for resistive switching with ultralow bias, *Adv. Funct. Mater.*, 2020, **30**, 2002110.
- 69 J. S. Han, Q. Van Le, J. Choi, K. Hong, C. W. Moon, T. L. Kim, H. Kim, S. Y. Kim and H. W. Jang, Air-stable cesium lead iodide perovskite for ultra-low operating voltage resistive switching, *Adv. Funct. Mater.*, 2018, **28**, 1–10.
- 70 T. Paul, P. K. Sarkar, S. Maiti and K. K. Chattopadhyay, Multilevel programming and light-assisted resistive switching in a halide-tunable all-inorganic perovskite cube for flexible memory devices, *ACS Appl. Electron. Mater.*, 2020, **2**, 3667–3677.
- 71 U. Das, A. Nyayban, B. Paul, A. Barman, P. Sarkar and A. Roy, Compliance current-dependent dual-functional bipolar and threshold resistive switching in all-inorganic rubidium lead-bromide perovskite-based flexible device, *ACS Appl. Electron. Mater.*, 2020, **2**, 1343–1351.
- 72 M. Kumar, H.-S. Kim, D. Y. Park, M. S. Jeong and J. Kim, Compliance-free multileveled resistive switching in a transparent 2d perovskite for neuromorphic computing, *ACS Appl. Mater. Interfaces*, 2018, **10**, 12768–12772.
- 73 T. Zhong, Y. Qin, F. Lv, H. Qin and X. Tian, Light-activated multilevel resistive switching storage in  $\text{Pt}/\text{Cs}_2\text{AgBiBr}_6/\text{ITO}/\text{Glass}$  devices, *Nanoscale Res. Lett.*, 2021, **16**, 178.
